# Supplementary material for: Magnetic conducting polymer/mesoporous SiO2 yolk/shell nanomaterials: multifunctional nanocarriers for controlled release of doxorubicin
Source: Royal Society of Chemistry journal article supplement (doi:10.1039/c5ra23580d), 2016-01-01
Supplement: c5ra23580d1.pdf [file c5ra23580d1.pdf]

## Supporting Information

### **Magnetic Conducting Polymer/Mesoporous SiO<sub>2</sub> Yolk/Shell Nanomaterials: Multifunctional Nanocarriers for Controlled Release of Doxorubicin**

Long Zhang,<sup>a,b</sup> Tianqing Liu<sup>a\*</sup> and Yuan Chen<sup>b</sup>

*<sup>a</sup>School of Chemistry and Chemical Engineering, Yangzhou University, Yangzhou,  
225002, Jiangsu, P. R. China*

*<sup>b</sup>School of Animal Pharmaceuticals, Jiangsu Agri-animal Husbandry, Vocational  
College, Taizhou 225300, Jiangsu, P. R. China*

\*Corresponding author. Email: [tqliu@yzu.edu.cn](mailto:tqliu@yzu.edu.cn)

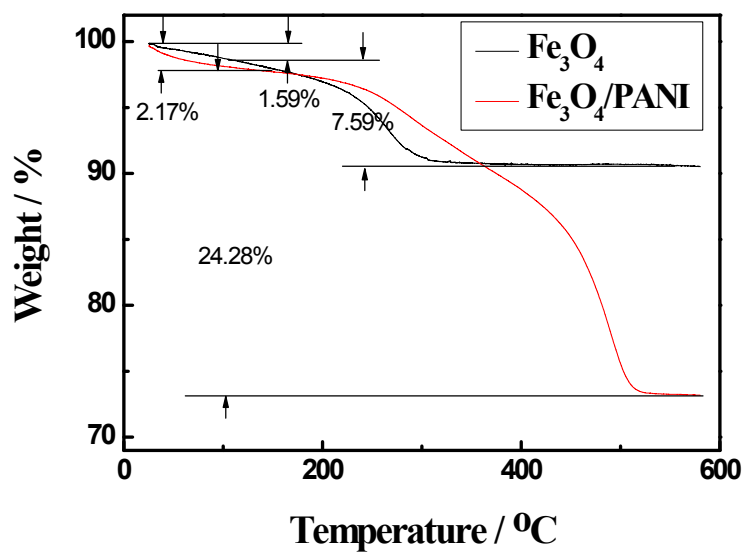

**Figure S1.** TG curves of PVP-modified Fe<sub>3</sub>O<sub>4</sub> and Fe<sub>3</sub>O<sub>4</sub>/PANI core/shell spheres. The first step loss is attributed to the loss of water or solvent, and the second step loss results from the degradation and decomposition of the polymer backbone. The PVP amount in Fe<sub>3</sub>O<sub>4</sub> is calculated to be 7.7%. Considering no weight loss during the coating process of PANI on surfaces of Fe<sub>3</sub>O<sub>4</sub>, the PANI amount in Fe<sub>3</sub>O<sub>4</sub>/PANI core/shell spheres is calculated to be 18.4%.

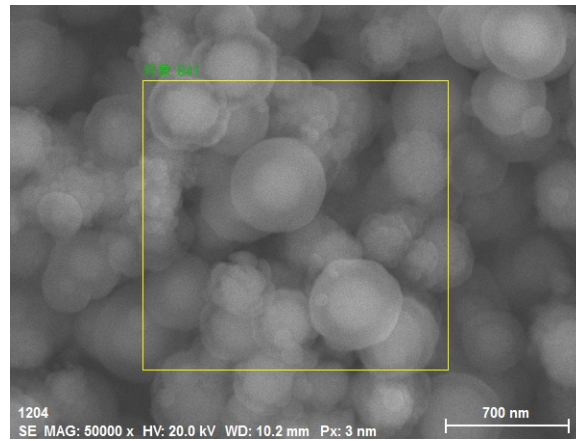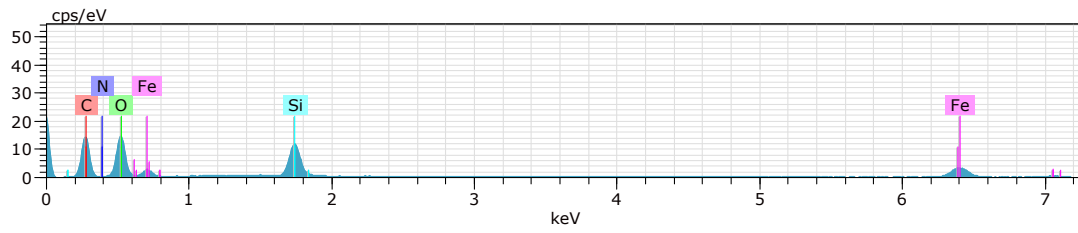

**Figure S2.** SEM image and EDS analysis of  $\text{Fe}_3\text{O}_4/\text{PANI}/\text{SiO}_2/\text{mesoporous SiO}_2$  core/shell spheres.
